# Supplementary material for: The Effect of Spinal Muscle Fatigue and Psychosocial Factors on Pressure-Pain Threshold in Healthy Adults
Source: Hindawi journal article supplement (doi:10.1155/2023/7336477), 2023-01-25

SUPPLEMENTARY MATERIAL

Scatterplots showing relationship between pressure pain threshold (PPT) and psychosocial variables. Please see also Table 2 and Figure 3.

● Male  
● Female

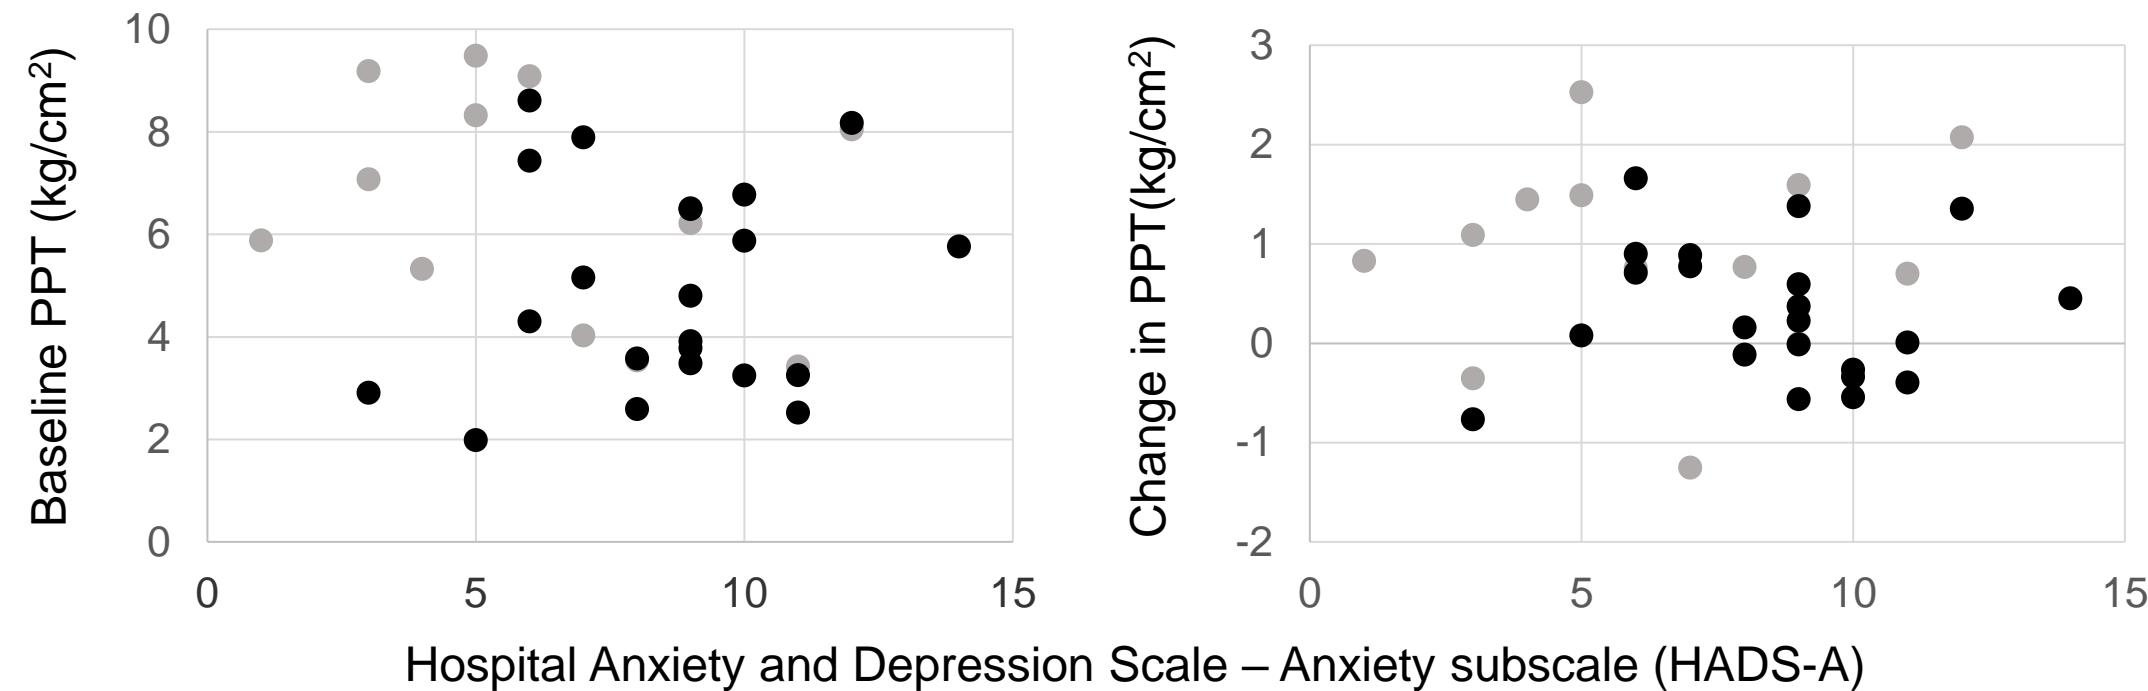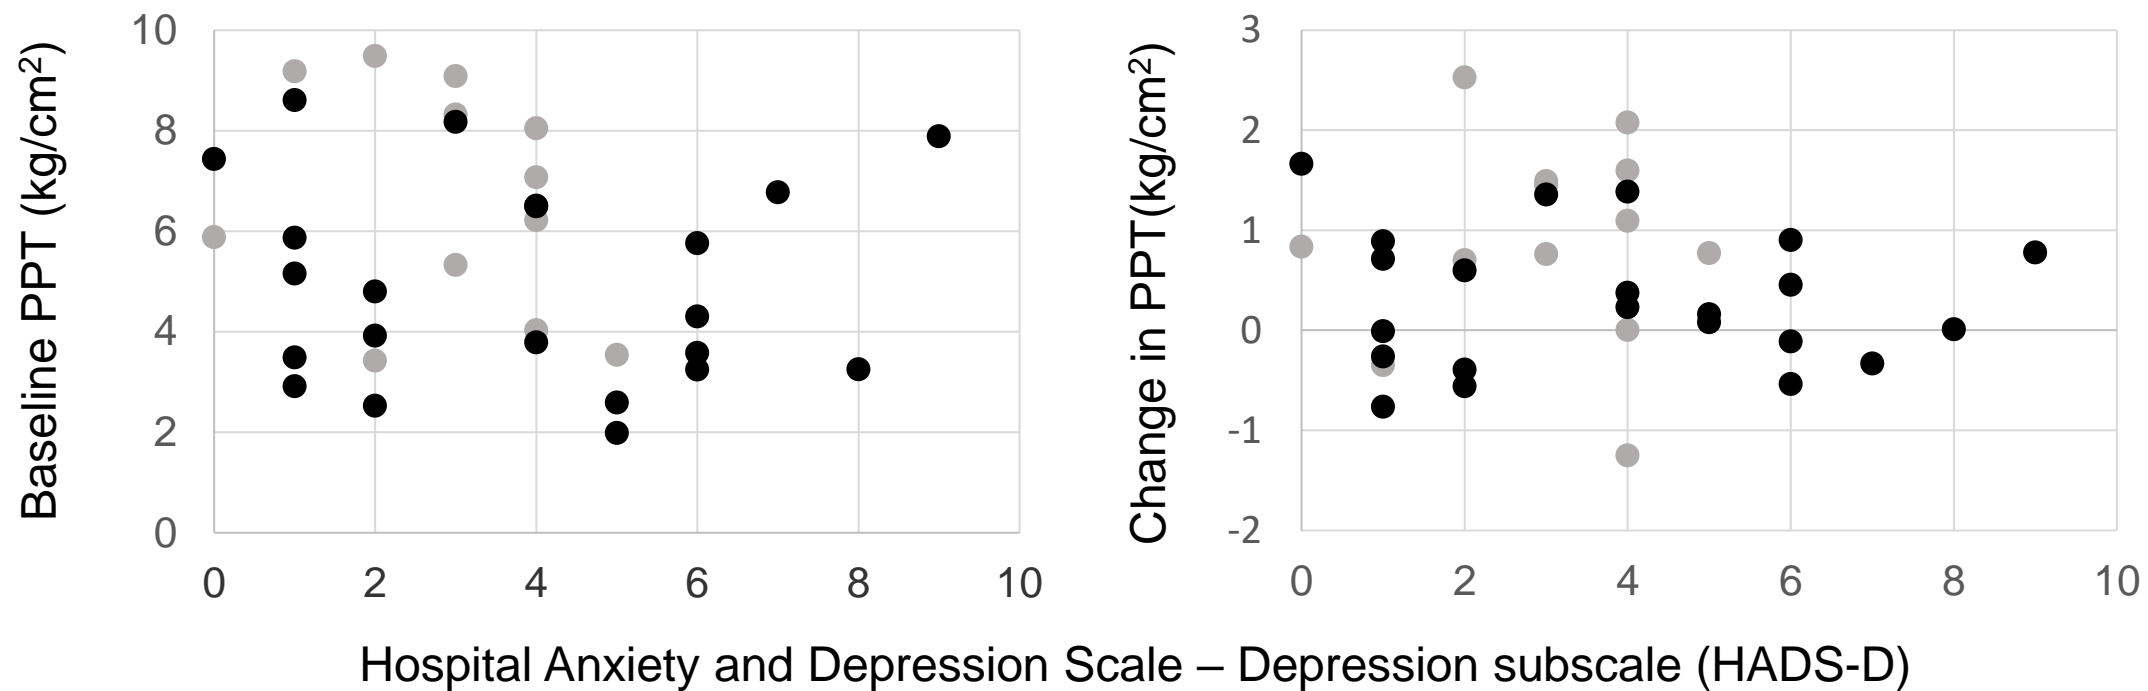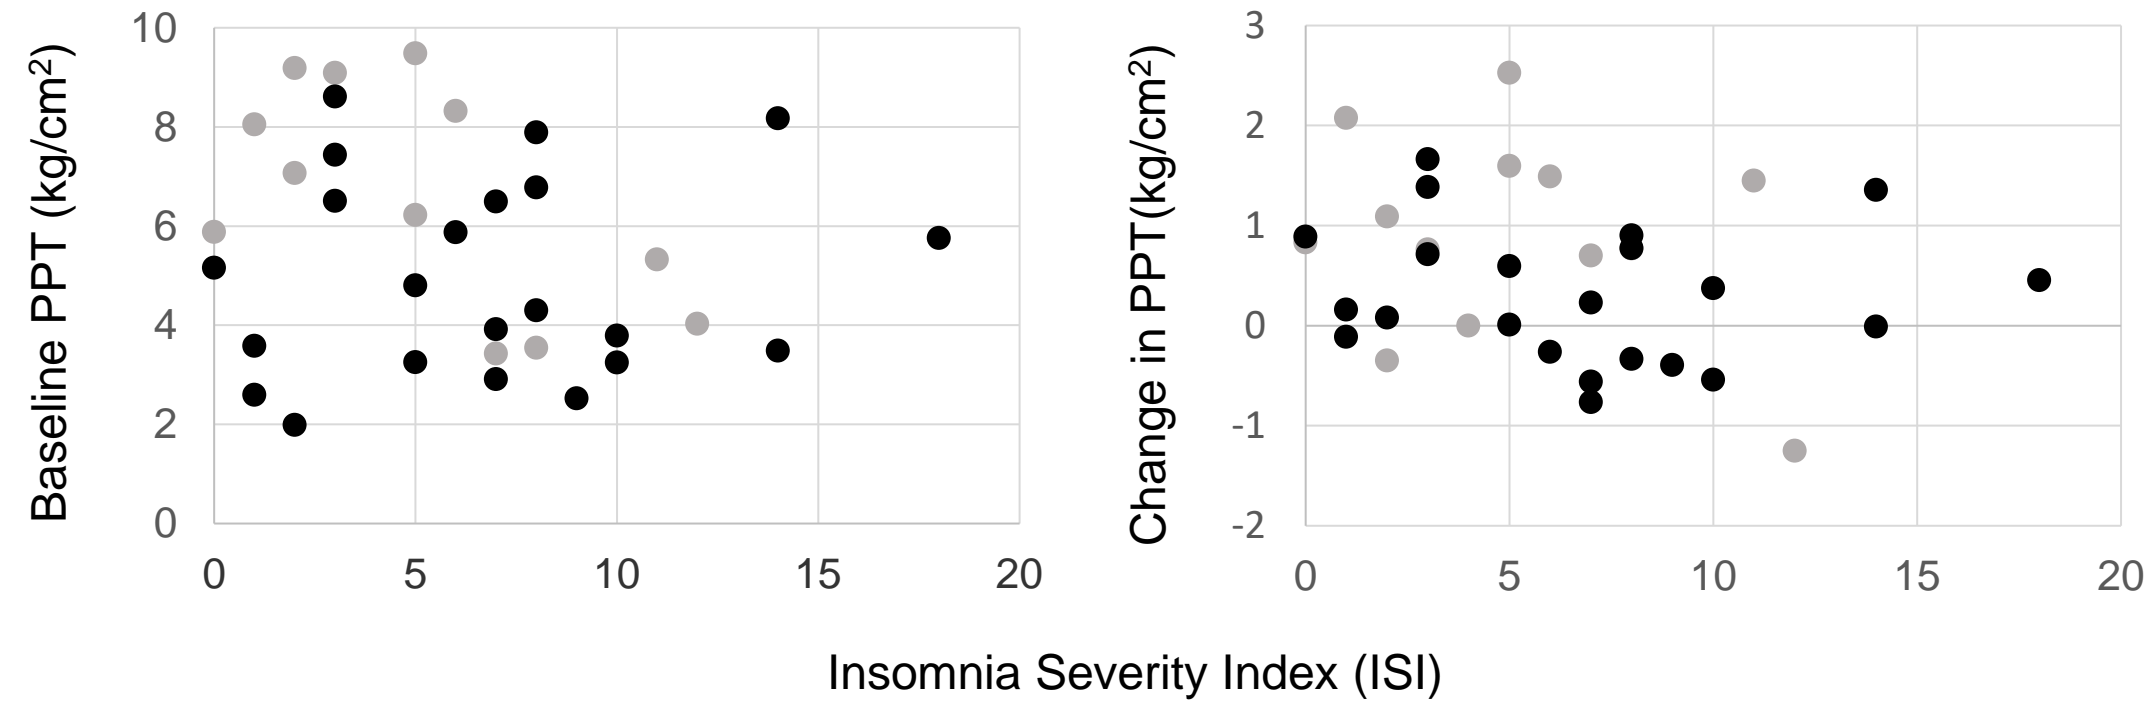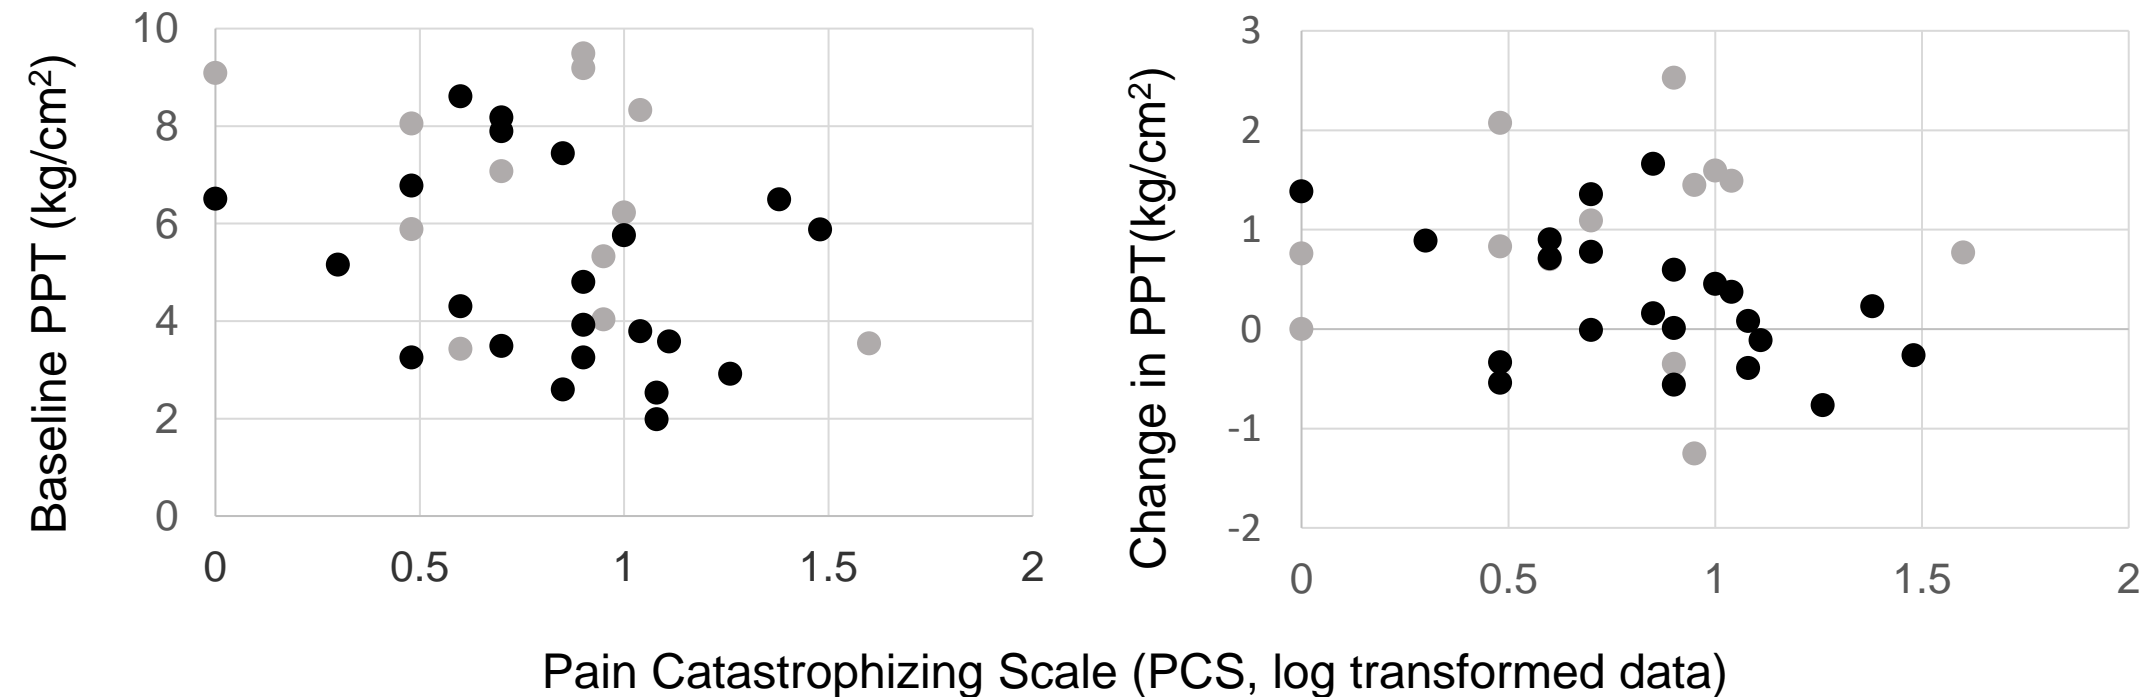

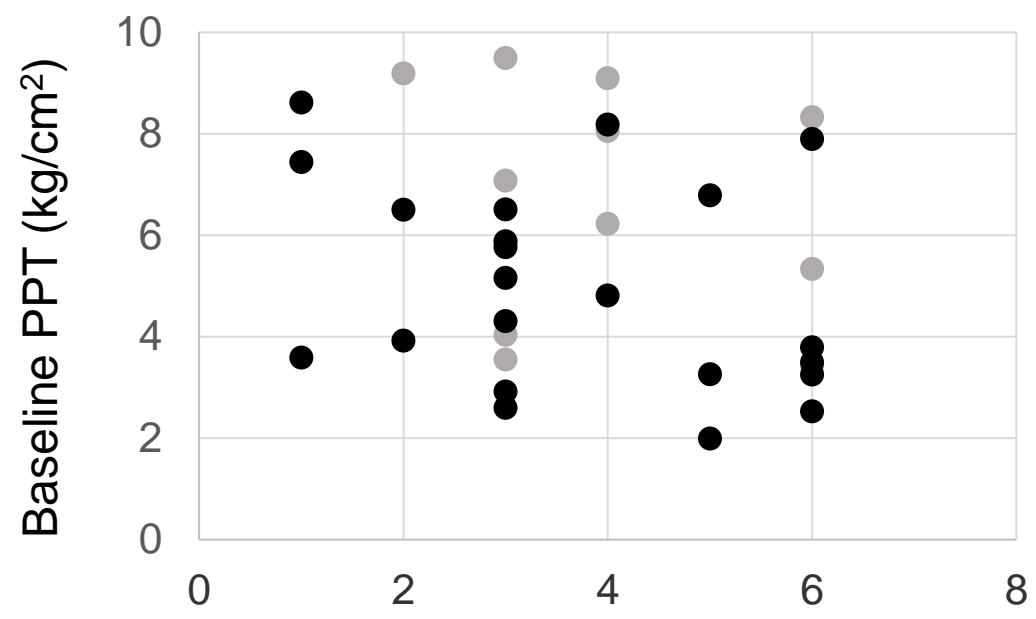

Karolinska Sleepiness Scale (KSS)

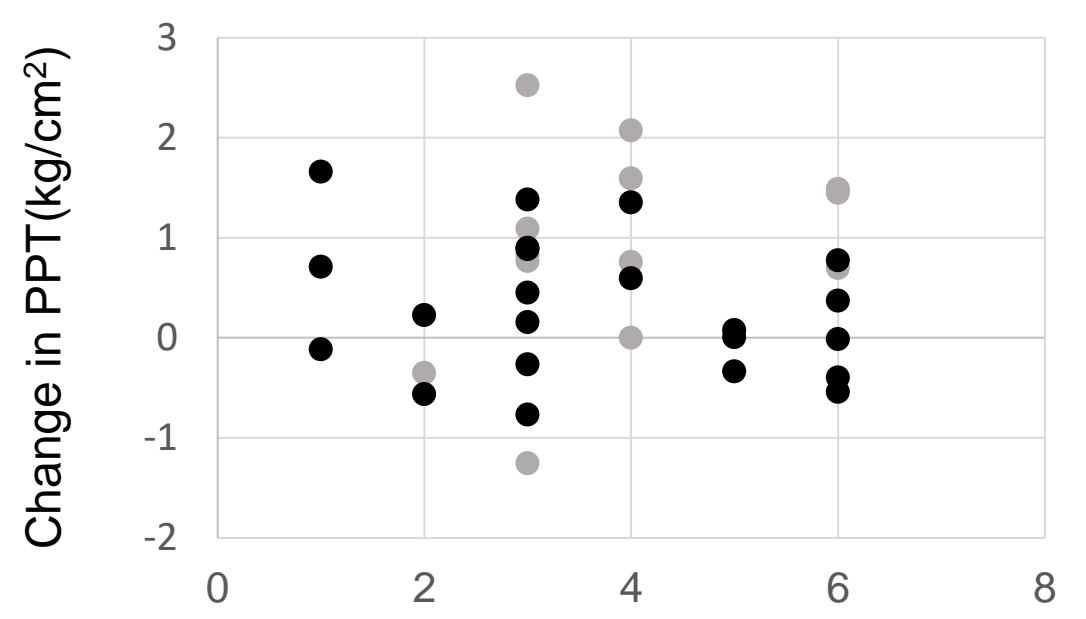

Supplement: f1 [file 7336477.f1.zip]
