# Supplementary material for: The Effect of Spinal Muscle Fatigue and Psychosocial Factors on Pressure-Pain Threshold in Healthy Adults
Source: Pain Res Manag. 2023 Jan 25;2023:7336477. doi: 10.1155/2023/7336477 (PMC9891829; doi:10.1155/2023/7336477)
Supplement: Supplementary Materials — Scatterplots are provided showing the relationship between pressure-pain threshold and the Hospital Anxiety and Depression Scale, Insomnia Severity Index, Pain Catastrophizing Scale, and Karolinska Sleepiness Scale. STROBE Statement-checklist of items that should be included in reports of observational studies. [file 7336477.f1.zip]

Archive with 2 entries (2 files):
- STROBE-checklist-v4-JAS.docx
- Supplementary Material.pdf
